# Supplementary material for: Isotopic Niche of Syntopic Granivores in Commercial Orchards and Meadows
Source: MDPI journal article supplement (doi:10.3390/ani11082375), 2021-08-11
Supplement: s1 [file s1]

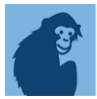

## Supplementary Material

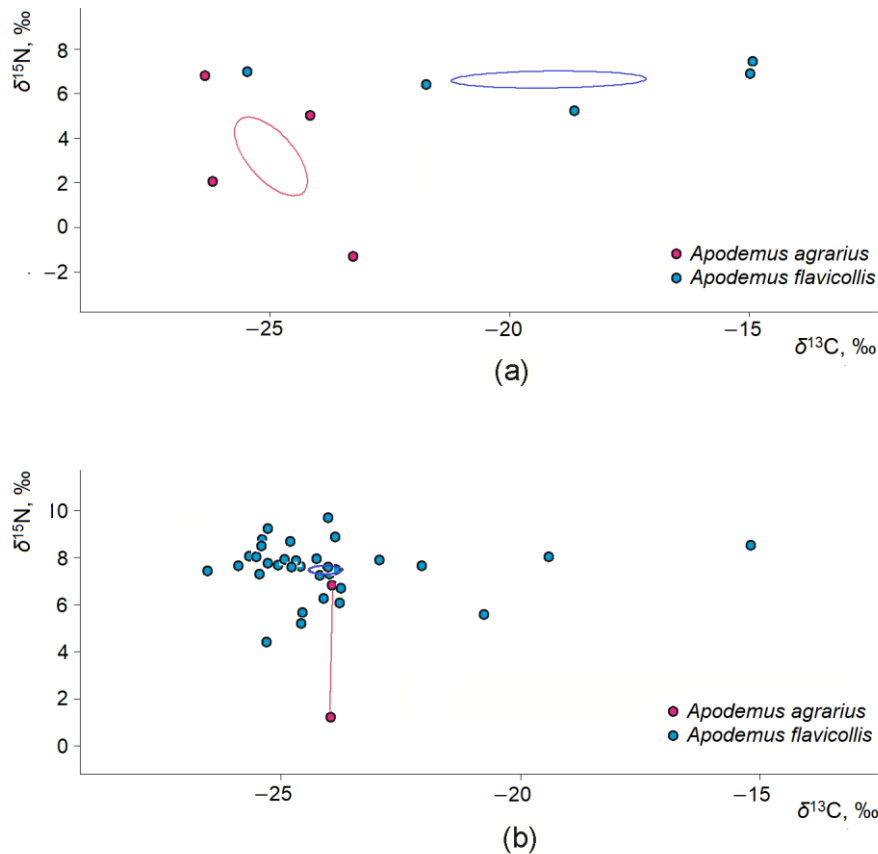

**Figure S1.** Central ellipses of two syntopic *Apodemus* species in the isotopic space, representing fundamental niches in plum orchards (a) and currant plantations (b).

**Table S1.** Central position (mean  $\pm$  SE) and ranges of stable isotope ratios in the hair of *Apodemus flavicollis*, *Apodemus agrarius* and *Micromys minutus* in the habitats of commercial orchards, berry plantations and control meadows in Lithuania, 2018–2020. Abbreviations: AO, apple orchards; PO, plum orchards; RP, raspberry plantations; CP, currant plantations; CH, control habitats; Af, *A. flavicollis*; Aa, *A. agrarius*; Mm, *M. minutus*; hyphen, species not present.

| Habitat | Species | $\delta^{13}\text{C}$ Values, ‰ |                     |       | $\delta^{15}\text{N}$ Values, ‰ |                  |       |
|---------|---------|---------------------------------|---------------------|-------|---------------------------------|------------------|-------|
|         |         | Mean $\pm$ SE                   | Min–max             | Range | Mean $\pm$ SE                   | Min–max          | Range |
| AO      | Af      | $-24.37 \pm 0.13$               | $-27.11$ – $-16.97$ | 10.14 | $5.09 \pm 0.14$                 | 2.27–9.71        | 7.44  |
|         | Aa      | $-22.92 \pm 0.57$               | $-29.69$ – $-12.28$ | 17.41 | $6.75 \pm 0.18$                 | 3.36–9.16        | 5.81  |
|         | Mm      | $-25.47 \pm 0.17$               | $-25.92$ – $-24.91$ | 1.01  | $10.13 \pm 3.09$                | 3.32–20.94       | 17.62 |
| PO      | Af      | $-24.97 \pm 0.76$               | $-26.34$ – $-23.25$ | 3.09  | $3.18 \pm 1.76$                 | $-1.28$ – $6.80$ | 8.08  |
|         | Aa      | $-19.18 \pm 2.03$               | $-25.50$ – $-14.94$ | 10.56 | $6.63 \pm 0.38$                 | 5.22–7.32        | 2.10  |
|         | Mm      | -                               | -                   | -     | -                               | -                | -     |
| RP      | Af      | $-24.87 \pm 0.17$               | $-26.69$ – $-23.40$ | 3.29  | $3.23 \pm 0.56$                 | $-1.74$ – $6.83$ | 8.57  |
|         | Aa      | $-22.85 \pm 0.45$               | $-26.52$ – $-15.04$ | 11.48 | $6.04 \pm 0.44$                 | 3.02–15.52       | 12.50 |
|         | Mm      | $-17.41$                        | -                   | -     | 6.00                            | -                | -     |
| CP      | Af      | $-23.95 \pm 0.03$               | $-23.98$ – $-23.92$ | 0.06  | $4.05 \pm 2.75$                 | 1.30–6.80        | 5.50  |
|         | Aa      | $-24.06 \pm 0.35$               | $-26.58$ – $-15.16$ | 11.42 | $7.48 \pm 0.18$                 | 4.44–9.22        | 4.78  |
|         | Mm      | -                               | -                   | -     | -                               | -                | -     |

|    |    |               |              |       |             |            |      |
|----|----|---------------|--------------|-------|-------------|------------|------|
| CH | Af | -23.94 ± 0.31 | -26.86—13.65 | 13.21 | 5.81 ± 0.17 | 2.91–8.87  | 5.96 |
|    | Aa | -23.55 ± 0.25 | -27.20—13.34 | 13.86 | 6.84 ± 0.17 | 2.52–11.11 | 8.59 |
|    | Mm | -23.35 ± 1.79 | -27.49—16.68 | 10.81 | 8.74 ± 0.76 | 6.95–11.46 | 4.51 |

**Table S2.** Size of isotopic niches of granivorous mice species in agricultural and control habitats: total area (TA), standard ellipse area (SEA) and central ellipses, corrected for sample size (SEAc); hyphen, number of processed samples < 5 or species not present.

| Habitat               | <i>Apodemus flavicollis</i> |       |       | <i>Apodemus agrarius</i> |       |       | <i>Micromys minutus</i> |       |       |
|-----------------------|-----------------------------|-------|-------|--------------------------|-------|-------|-------------------------|-------|-------|
|                       | TA                          | SEA   | SEAc  | TA                       | SEA   | SEAc  | TA                      | SEA   | SEAc  |
| Apple orchards        | 55.43                       | 7.30  | 7.35  | 56.31                    | 13.77 | 14.09 | 6.70                    | 6.27  | 8.36  |
| Plum orchards         | 12.40                       | 13.14 | 19.71 | 11.04                    | 12.06 | 16.08 | -                       | -     | -     |
| Raspberry plantations | 11.04                       | 12.06 | 16.08 | 12.40                    | 13.14 | 19.71 | -                       | -     | -     |
| Currant plantations   | -                           | -     | -     | 30.80                    | 6.79  | 7.00  | -                       | -     | -     |
| Control habitats      | 45.72                       | 11.68 | 11.82 | 77.60                    | 13.77 | 13.89 | 20.18                   | 19.79 | 26.39 |
